# Supplementary material for: Insights into the genomic evolution of insects from cricket genomes
Source: PubMed Central journal article supplement (PMC8203789; doi:10.1038/s42003-021-02197-9), 2021-06-14
Supplement: 42003_2021_2197_MOESM1_ESM.pdf [file 42003_2021_2197_MOESM1_ESM.pdf]

1 **Supplementary Information for**

2 **Insights into the genomic evolution of insect from Cricket**  
3 **genomes**

4 Guillem Ylla, Taro Nakamura, Takehiko Itoh, Rei Kajitani, Atsushi Toyoda, Sayuri Tomonari,  
5 Tetsuya Bando, Yoshiyasu Ishimaru, Takahito Watanabe, Masao Fuketa, Yuji Matsuoka, Austen  
6 A. Barnett, Sumihare Noji, Taro Mito, Cassandra G. Extavour

7  
8 This Supplementary Information file consists of the following:

- 9  
10 • Supplementary Figures 1 - 4  
11 • Supplementary Tables 1 - 5  
12 • Supplementary Note 1  
13 • Supplementary References

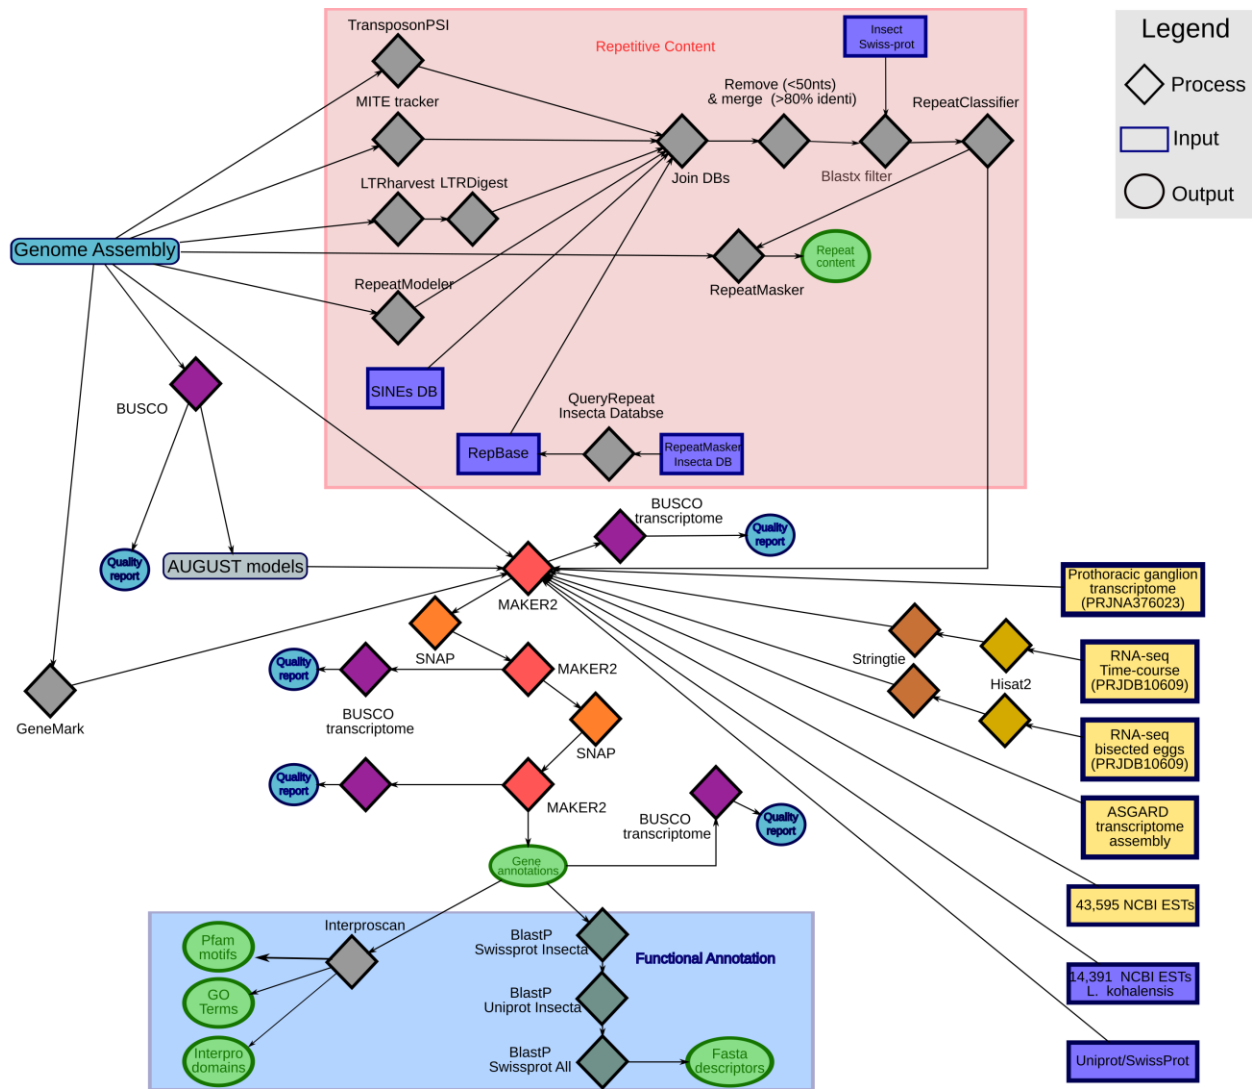

14  
15  
16  
17  
18  
19  
20  
21  
22

**Supplementary Figure 1: Schematic of *G. bimaculatus* genome annotation pipeline.** Rectangles represent data inputs: yellow rectangles represent *G. bimaculatus* data; purple rectangles represent data from other species or databases. Diamonds represent computational processes: gray diamonds indicate processes executed a single time; non-gray diamonds of the same color indicate the same process. Circles indicate outputs: blue circles indicate quality controls; green circles indicate annotations. Scripts available at GitHub [https://github.com/guillemylla/Crickets\\_Genome\\_Annotation](https://github.com/guillemylla/Crickets_Genome_Annotation).

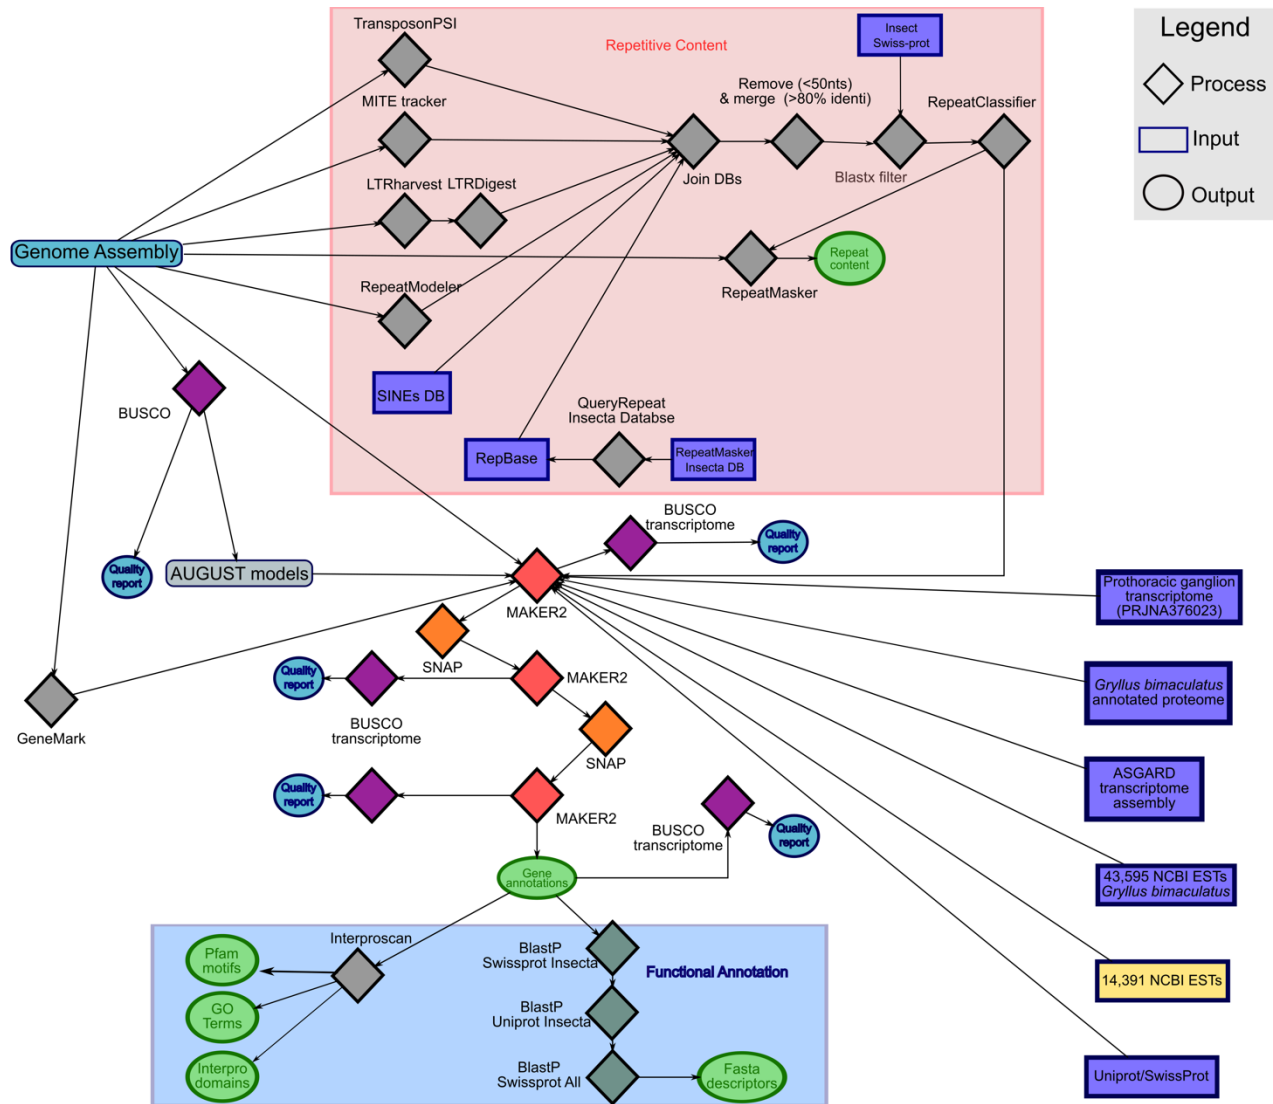

23  
24  
25  
26  
27  
28  
29  
30  
31  
32  
33  
34  
35  
36  
37  
38  
39

**Supplementary Figure 2: Scheme of *L. kohalensis* genome annotation pipeline. All symbols as per Supplementary Figure 1.**

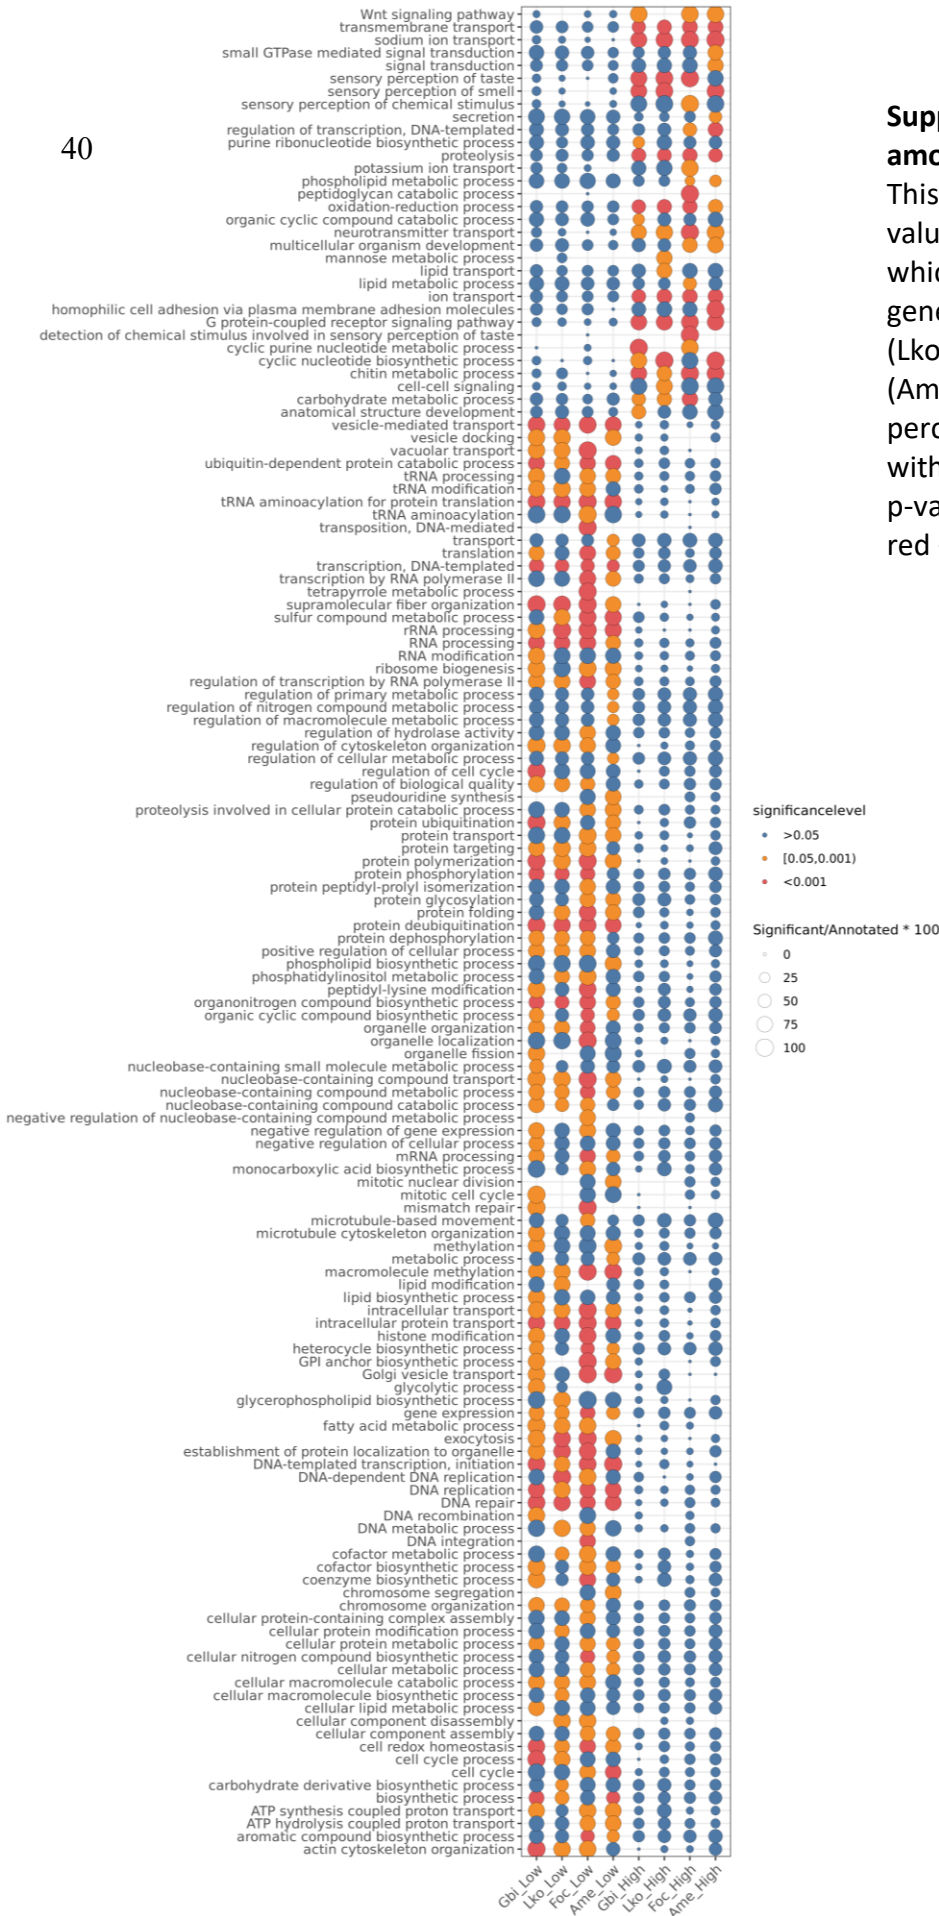

**Supplementary Figure 3: Enriched GO-terms among genes with high or low CpGo/e levels.**

This plot shows the enriched GO terms with p-value<0.05 in at least one of the eight categories which are the high CpGo/e and low CpGo/e genes of *G. bimaculatus* (Gbi), *L. kohalensis* (Lko), *F. occidentalis* (Foc), and *A. mellifera* (Ame). The dot diameter is proportional the percentage of significant genes with the GO term within the gene set. The dot color represents the p-value level, blue >0.05, orange [0.05, 0.001), red <0.001.

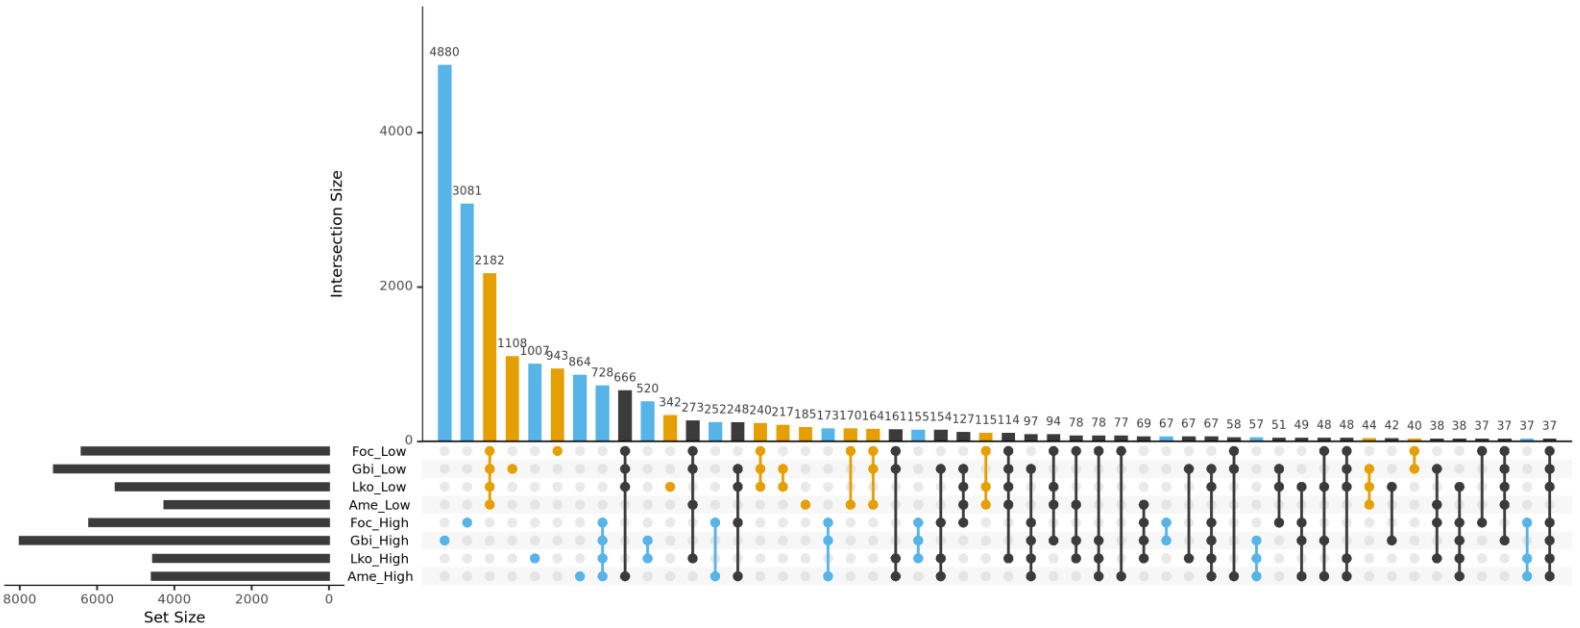

42 **Supplementary Figure 4: UpSet plot of orthologous genes with the high and low CpG<sub>o/e</sub>.**  
 43 Top 50 intersections of orthogroups (OGs) that are common across the 8 different categories,  
 44 which are the high CpG<sub>o/e</sub> and low CpG<sub>o/e</sub> genes for *G. bimaculatus* (Gbi), *L. kohalensis* (Lko), *F.*  
 45 *Occidentalis* (Foc), and *A. mellifera* (Ame). Blue color indicates OGs that contain genes that only  
 46 belong to high CpG<sub>o/e</sub> peak and yellow OGs that contains genes that only belong to the low  
 47 CpG<sub>o/e</sub> and peak.  
 48

**Supplementary Table 1:** Number of species with available genome assembly in NCBI (RefSeq and GeneBank) for each of the 15 hemimetabolous orders and for all holometabolous species as for March 26, 2021.

| <b>Hemimetabolous Order</b> | <b>Number of spp with available genome assembly</b> |
|-----------------------------|-----------------------------------------------------|
| Zoraptera                   | 0                                                   |
| Mantodea                    | 0                                                   |
| Mantophasmatodea            | 0                                                   |
| Grylloblattodea             | 0                                                   |
| Embiodea                    | 0                                                   |
| Psocoptera                  | 0                                                   |
| Dermaptera                  | 1                                                   |
| Phthiraptera                | 2                                                   |
| Odonata                     | 3                                                   |
| Ephemeroptera               | 3                                                   |
| Plecoptera                  | 3                                                   |
| Thysanoptera                | 3                                                   |
| Blattodea                   | 5                                                   |
| Orthoptera                  | 6                                                   |
| Phasmatodea                 | 13                                                  |
| Hemiptera                   | 49                                                  |
| <b>Taxon</b>                | <b>Number of spp with available genome assembly</b> |
| Holometabola                | 601                                                 |

50 **Supplementary Table 2: RepeatMasker summary report for *G. bimaculatus*.** Report of the  
 51 repeat content in the genome of *G. bimaculatus* generated by RepeatMasker using custom  
 52 libraries.  
 53

---

Species: *Gryllus bimaculatus*  
 sequences: 47877  
 total length: 1658007496 bp (1601517380 bp excl N/X-runs)  
 GC level: 39.93 %  
 bases masked: 558652201 bp ( 33.69 %)

---

|                             | Number of elements* | Length      | Percentage |
|-----------------------------|---------------------|-------------|------------|
| SINEs:                      | 138895              | 26406967bp  | 1.59%      |
| ALUs                        | 6                   | 9564bp      | 0.00%      |
| MIRs                        | 0                   | 0bp         | 0.00%      |
| LINEs:                      | 454301              | 147302087bp | 8.88%      |
| LINE1                       | 1803                | 826764bp    | 0.05%      |
| LINE2                       | 115576              | 32029561bp  | 1.93%      |
| L3/CR1                      | 18286               | 6358119bp   | 0.38%      |
| LTR elements:               | 131656              | 36970251bp  | 2.23%      |
| ERV_L                       | 92                  | 44183bp     | 0.00%      |
| ERV_L-MaLRs                 | 0                   | 0bp         | 0.00%      |
| ERV_classI                  | 11451               | 2441461bp   | 0.15%      |
| ERV_classII                 | 980                 | 401749bp    | 0.02%      |
| DNA elements:               | 500741              | 142828465bp | 8.61%      |
| hAT-Charlie                 | 11512               | 4094376bp   | 0.25%      |
| TcMar-Tigger                | 2039                | 537995bp    | 0.03%      |
| Unclassified:               | 367653              | 126552078bp | 7.63%      |
| Total interspersed repeats: |                     | 480059848bp | 28.95%     |
| Small RNA:                  | 2562                | 1002728bp   | 0.06%      |
| Satellites:                 | 31087               | 7528498bp   | 0.45%      |
| Simple repeats:             | 769175              | 77632578bp  | 4.68%      |
| Low complexity:             | 85129               | 6215377bp   | 0.37%      |

---

\* most repeats fragmented by insertions or deletions have been counted as one element  
 RepeatMasker version open-4.0.5 , default mode  
 run with rmbblastn version 2.2.27+  
 RepBase Update 20160829, RM database version 20160829

54

55 **Supplementary Table 3: RepeatMasker summary report for *L. kohalensis*.** Report of the  
 56 repeat content in the genome of *L. kohalensis* generated by RepeatMasker using custom  
 57 libraries.  
 58

---

Species: *Laupala kohalensis*  
 Sequences: 148784  
 total length: 1595214429 bp (1563778341 bp excl N/X-runs)  
 GC level: 35.58 %  
 bases masked: 566518287 bp ( 35.51 %)

---

|                             | Number of elements* | Length      | Percentage |
|-----------------------------|---------------------|-------------|------------|
| SINEs:                      | 29510               | 7083717bp   | 0.44%      |
| ALUs                        | 304                 | 101257bp    | 0.01%      |
| MIRs                        | 1248                | 430584bp    | 0.03%      |
| LINEs:                      | 1035151             | 322470849bp | 20.21%     |
| LINE1                       | 941                 | 367057bp    | 0.02%      |
| LINE2                       | 584526              | 167380843bp | 10.49%     |
| L3/CR1                      | 10257               | 4624100bp   | 0.29%      |
| LTR elements:               | 57347               | 29690552bp  | 1.86%      |
| ERV1                        | 231                 | 43500bp     | 0.00%      |
| ERV1-MaLRs                  | 0                   | 0bp         | 0.00%      |
| ERV_classI                  | 1821                | 585650bp    | 0.04%      |
| ERV_classII                 | 389                 | 125302bp    | 0.01%      |
| DNA elements:               | 189815              | 62384975bp  | 3.91%      |
| hAT-Charlie                 | 15008               | 5154516bp   | 0.32%      |
| TcMar-Tigger                | 8896                | 2459752bp   | 0.15%      |
| Unclassified:               | 409303              | 128822550bp | 8.08%      |
| Total interspersed repeats: |                     | 550452643bp | 34.51%     |
| Small RNA:                  | 13816               | 3005585bp   | 0.19%      |
| Satellites:                 | 2088                | 882748bp    | 0.06%      |
| Simple repeats:             | 307925              | 19782955bp  | 1.24%      |
| Low complexity:             | 48386               | 2381730bp   | 0.15%      |

---

\* most repeats fragmented by insertions or deletions have been counted as one element  
 RepeatMasker version open-4.0.5 , default mode  
 run with rmblastn version 2.2.27+  
 RepBase Update 20160829, RM database version 20160829

59  
 60



61 **Supplementary Table 4:** The orthogroups (OG) containing the 31 *D. melanogaster* pickpocket  
62 genes, with their FlyBase ID, symbol, and class according to Zelle, Lu <sup>1</sup>.  
63

| OG           | Flybase ID  | Dmel symbol        | Zelle 2013 class |
|--------------|-------------|--------------------|------------------|
| OG0000361.fa | FBgn0034965 | <i>ppk29</i>       | I                |
| OG0000361.fa | FBgn0039424 | <i>ppk15</i>       | I                |
| OG0000361.fa | FBgn0051065 | <i>ppk31</i>       | I                |
| OG0000361.fa | FBgn0053508 | <i>ppk13</i>       | I                |
| OG0009052.fa | FBgn0032602 | <i>ppk17</i>       | V                |
| OG0000185.fa | FBgn0039675 | <i>ppk21</i>       | III              |
| OG0000185.fa | FBgn0039677 | <i>ppk30</i>       | III              |
| OG0000185.fa | FBgn0039679 | <i>ppk19</i>       | III              |
| OG0000185.fa | FBgn0065109 | <i>ppk11</i>       | IV               |
| OG0000185.fa | FBgn0039676 | <i>ppk20</i>       | III              |
| OG0000185.fa | FBgn0031802 | <i>ppk7</i>        | III              |
| OG0000185.fa | FBgn0031803 | <i>ppk14</i>       | III              |
| OG0000072.fa | FBgn0022981 | <i>rpk / ppk2</i>  | V                |
| OG0000072.fa | FBgn0034730 | <i>ppk12</i>       | V                |
| OG0000072.fa | FBgn0052792 | <i>ppk8</i>        | V                |
| OG0000072.fa | FBgn0053289 | <i>ppk5</i>        | V                |
| OG0000072.fa | FBgn0020258 | <i>ppk / ppk1</i>  | V                |
| OG0000072.fa | FBgn0265001 | <i>ppk18</i>       | IV               |
| OG0000072.fa | FBgn0030795 | <i>ppk28</i>       | V                |
| OG0000072.fa | FBgn0035785 | <i>ppk26</i>       | V                |
| OG0011276.fa | FBgn0035458 | <i>ppk27</i>       | IV               |
| OG0000243.fa | FBgn0034489 | <i>ppk6</i>        | IV               |
| OG0000243.fa | FBgn0039839 | <i>ppk24</i>       | IV               |
| OG0000243.fa | FBgn0051105 | <i>ppk22</i>       | IV               |
| OG0000243.fa | FBgn0065108 | <i>ppk16</i>       | IV               |
| OG0000243.fa | FBgn0024319 | <i>Nach / ppk4</i> | IV               |
| OG0000167.fa | FBgn0050181 | <i>ppk3</i>        | II               |
| OG0000167.fa | FBgn0053349 | <i>ppk25</i>       | II               |
| OG0000167.fa | FBgn0065110 | <i>ppk10</i>       | II               |
| OG0000167.fa | FBgn0085398 | <i>ppk9</i>        | II               |
| OG0000167.fa | FBgn0030844 | <i>ppk23</i>       | VI               |

64  
65

66 **Supplementary Table 5: *pickpocket* genes present in previous QTL analyses examining the genetic basis for sound-based cricket**  
 67 **courtship behavior variation.** Genomic position information for the *L. kohalensis pickpocket* genes found in linkage groups (LG) in  
 68 previously published QTL analyses<sup>2, 3, 4</sup> examining mating song rhythm variations and female acoustic preference in the genus  
 69 *Laupala*.  
 70

| Scaff names   |                  |         |         |       |        |           |           | Table S3 and S6<br>(Blankers, Oh <sup>2</sup> ) |           | Table S4<br>(Blankers, Oh <sup>3</sup> ) |    | Table 2 (Xu<br>and Shaw <sup>4</sup> ) |  |
|---------------|------------------|---------|---------|-------|--------|-----------|-----------|-------------------------------------------------|-----------|------------------------------------------|----|----------------------------------------|--|
| Shaw          | Scaff Names NCBI | start   | end     | width | strand | Name      | Ppk class | LG                                              | proximity | LG                                       | LG | LG                                     |  |
| Lko057S000409 | NNCF01126148.1   | 1083057 | 1116038 | 32982 | +      | Lko_01144 | Class IV  | 1                                               | LOD1      | 1                                        |    |                                        |  |
| Lko057S000550 | NNCF01126289.1   | 666338  | 667949  | 1612  | -      | Lko_06470 | Class IV  | 3                                               | LOD2      |                                          |    |                                        |  |
| Lko057S005538 | NNCF01131273.1   | 20948   | 31450   | 10503 | -      | Lko_31867 | Class V   | 4                                               | LOD1      |                                          |    |                                        |  |
| Lko057S005538 | NNCF01131273.1   | 6676    | 8154    | 1479  | -      | Lko_31866 | Class V   | 4                                               | LOD1      |                                          |    |                                        |  |
| Lko057S005538 | NNCF01131273.1   | 43198   | 60736   | 17539 | -      | Lko_31869 | Class V   | 4                                               | LOD1      |                                          |    |                                        |  |
| Lko057S000206 | NNCF01125945.1   | 353321  | 357106  | 3786  | -      | Lko_06341 | Class III |                                                 |           |                                          |    | 3                                      |  |
| Lko057S000206 | NNCF01125945.1   | 404113  | 432386  | 28274 | -      | Lko_06342 | Class III |                                                 |           |                                          |    | 3                                      |  |

71

72  
73  
74  
75  
76  
77

**Supplementary Note 1:** Genome size estimation by k-mer on a different dataset than the one used for the genome assembly. For this analysis we used 751M reads obtained from DNA of multiple specimens.

| Platform     | Number of Reads | Total bases    | Ave. Read Length |
|--------------|-----------------|----------------|------------------|
| <b>GAIx</b>  | 353,824,480     | 52,699,721,836 | 148.943          |
| <b>HiSeq</b> | 398,005,266     | 40,198,822,874 | 101.001          |
| <b>Total</b> | 751,829,746     | 92,898,544,710 | 123.563          |

78  
79  
80  
81

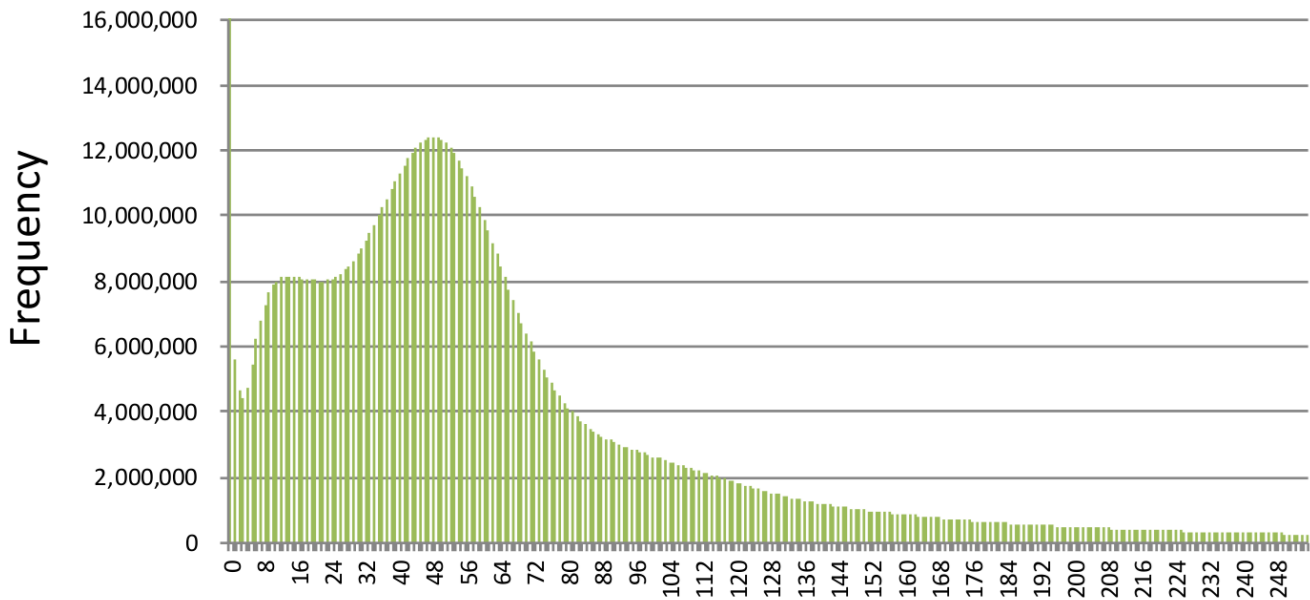

82  
83

---

|  |                         |                  |
|--|-------------------------|------------------|
|  | [K] K-mer               | 17               |
|  | [D] Peak K-mer          | 48               |
|  | [N] Total Reads         | 751,829,746      |
|  | [L] Average Read length | 123.6            |
|  | [B] Low frequency K-mer | 47,170,416       |
|  | [G] Estimate Size       | 1,683,793,716 bp |

$$[G] = \frac{\{ [N] * ([L] - [K] + 1) \} - [B]}{[D]}$$

84 **Supplementary References**

85

86

87 1. Zelle KM, Lu B, Pyfrom SC, Ben-Shahar Y. The genetic architecture of  
88 degenerin/epithelial sodium channels in *Drosophila*. In: *G3: Genes, Genomes, Genetics*.  
89 Genetics Society of America (2013).

90

91 2. Blankers T, Oh KP, Shaw KL. The genetics of a behavioral speciation phenotype in an  
92 Island system. In: *Genes*. Multidisciplinary Digital Publishing Institute (2018).

93

94 3. Blankers T, Oh KP, Bombarely A, Shaw KL. The genomic architecture of a rapid Island  
95 radiation: Recombination rate variation, chromosome structure, and genome assembly of  
96 the hawaiian cricket *Laupala*. In: *Genetics*. Genetics (2018).

97

98 4. Xu M, Shaw KL. The genetics of mating song evolution underlying rapid speciation:  
99 Linking quantitative variation to candidate genes for behavioral isolation. In: *Genetics*  
100 (2019).
